# Supplementary material
Source: PubMed Central journal article supplement (PMC5433437)
Supplement: NIHMS849498-supplement-Supplemental_Figure_1.pdf [file NIHMS849498-supplement-Supplemental_Figure_1.pdf]

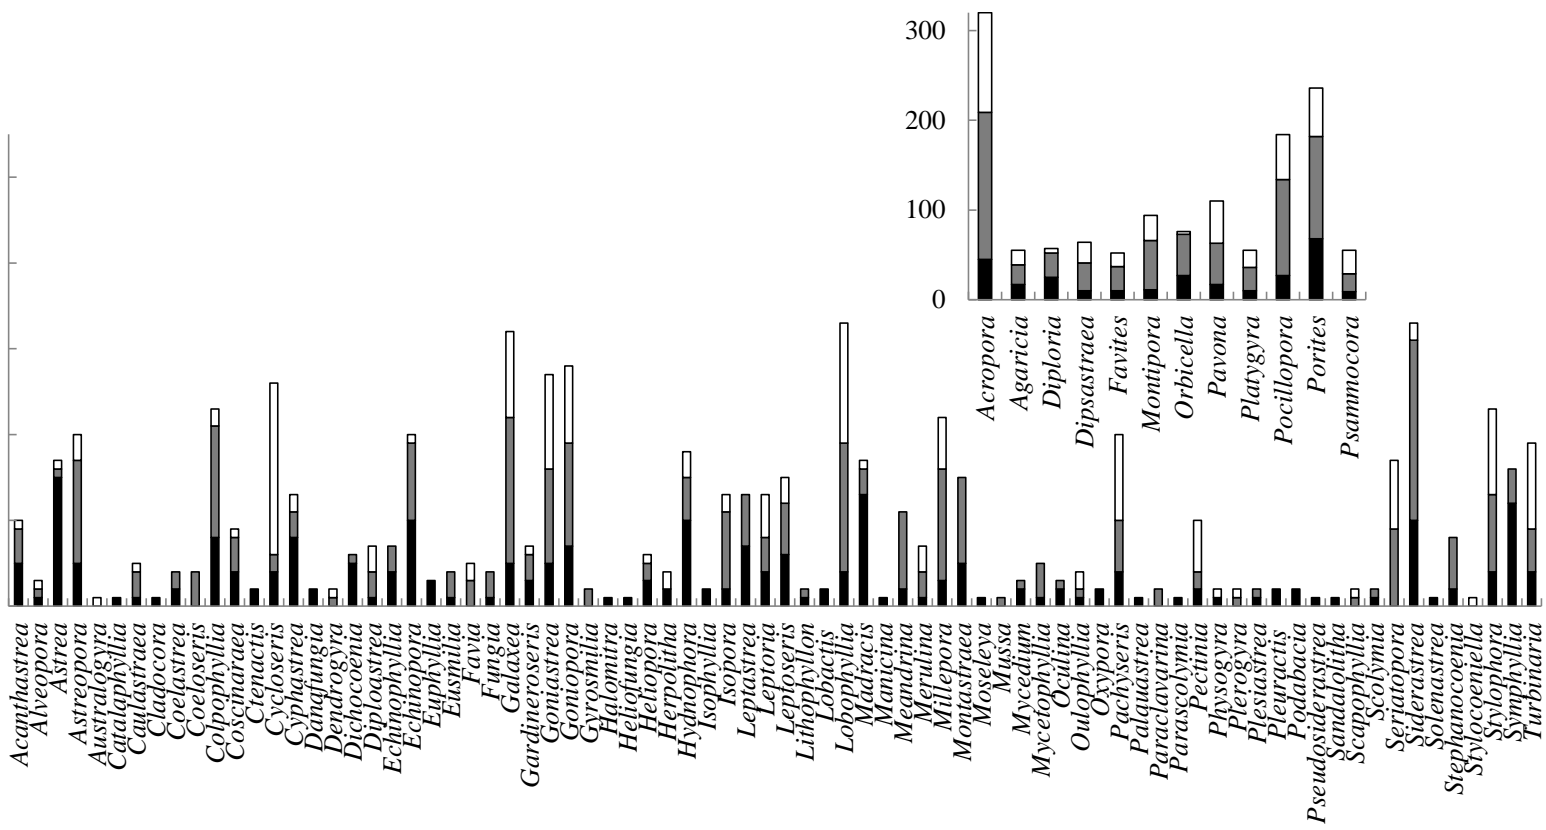

**Figure S1.** Number of standardized bleaching and mortality records ( $B_{jk}$ ) per genus for genera with  $< 50$  records and  $> 50$  records (inset) categorized as high ( $\geq 75^{\text{th}}$  percentile; open bars), medium (grey bars), and low ( $\leq 25^{\text{th}}$  percentile; black bars) bleaching severity.
